# Supplementary material
Source: PubMed Central journal article supplement (PMC2234169)

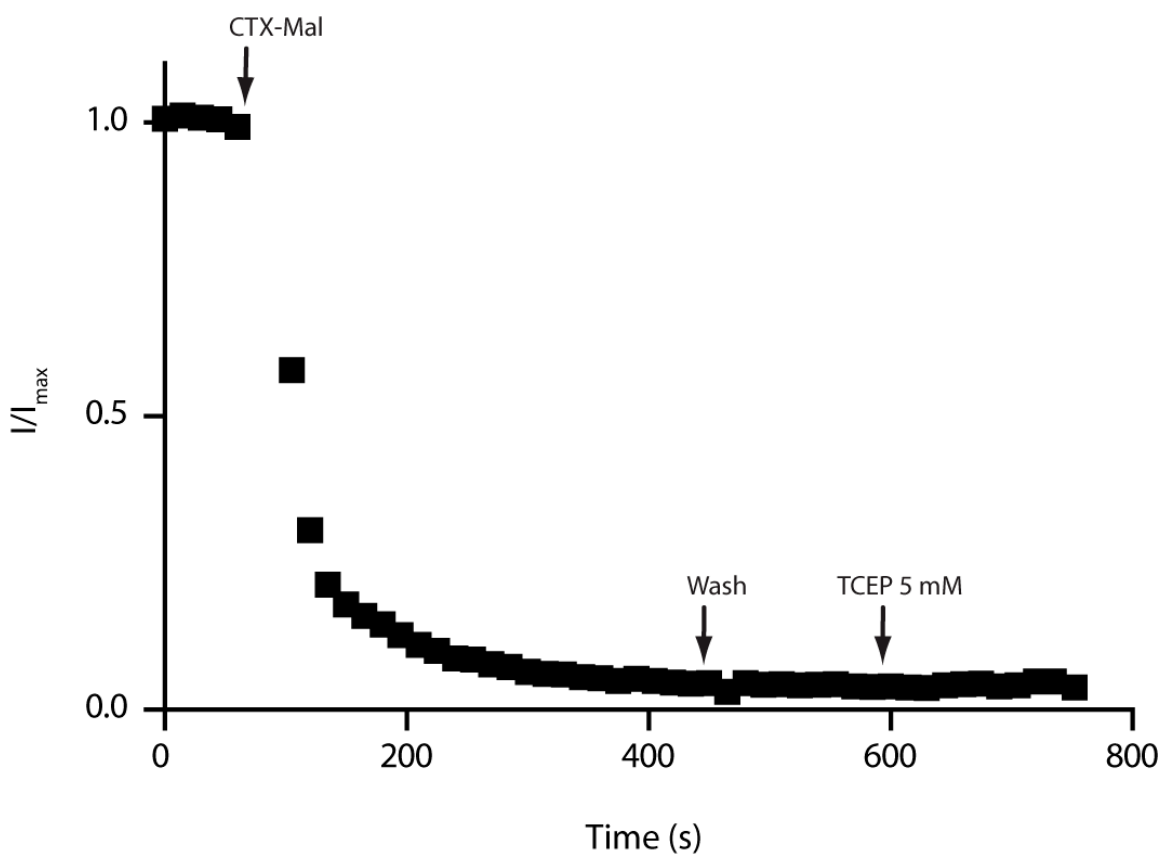

Supplement: pnas_0710366105_1.pdf [file pnas_0710366105_1.pdf]

070629-05 #2 RT: 0.01 AV: 1 NL: 4.76E5  
T: ITMS + c ESI Full ms [600.00-2000.00]

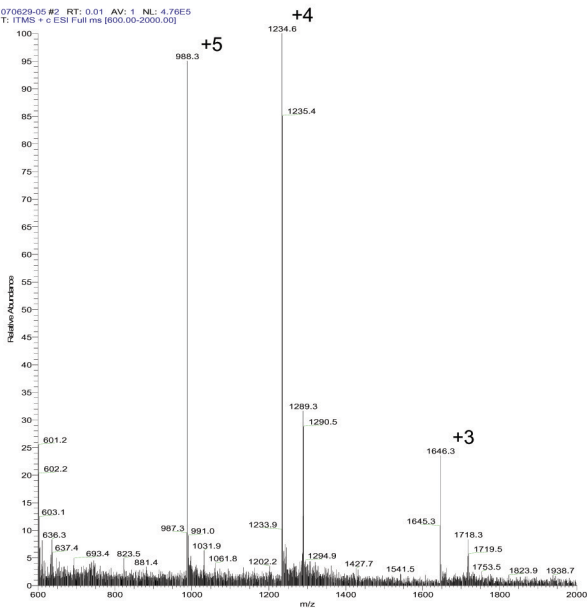

Supplement: pnas_0710366105_2.pdf [file pnas_0710366105_2.pdf]
